# Supplementary material for: The Transglutaminase-2 Interactome in the APP23 Mouse Model of Alzheimer’s Disease
Source: MDPI journal article supplement (doi:10.3390/cells11030389), 2022-01-24
Supplement: s1 [file s1]

## Supplementary files

**Supplementary Table S1:** Details of antibodies used for IHC and IF.

| Antigen                  | Primary antibody                                                | Dilution | Raised in | Fixation | Company                                     |
|--------------------------|-----------------------------------------------------------------|----------|-----------|----------|---------------------------------------------|
| Amyloid- Beta            | Human A $\beta$ (715800)                                        | 1/400    | Rabbit    | Acetone  | Invitrogen. Carlsbad, CA, USA               |
| Astrocytes               | Bovine glial fibrillary acidic protein antibody                 | 1/400    | Rabbit    | Acetone  | DAKO. Santa Clara, CA, USA                  |
| Microglia                | CD45- Mouse protein tyrosine phosphatase receptor type C        | 1/100    | Rat       | Acetone  | Gift cell biology VUMC                      |
| Hyper-phosphorylated tau | tau protein phosphorylated at both serine 202 and threonine 205 | 1/2000   | Mouse     | PFA      | Thermo Fischer scientific, Waltham, MA, USA |
| TG2                      | Guinea pig TG2 (06471)                                          | 1/4000   | Goat      | Acetone  | Millipore, Temecula, CA, USA                |

**Supplementary Table S2:** Details of primers used for semi-quantitative RT-PCR.

| Gene        | Forward                   | Reverse                    |
|-------------|---------------------------|----------------------------|
| mouse HPRT1 | CTCATGGACTGATTATGGACAGGAC | GCAGGTCAGCAAAGAACTTATAGCC  |
| human APP   | ACACAGAAAACGAAGTTGAGCC    | AATTCTGCATCCAGATTCACTTCAGA |
| mouse TGM1  | ACCAGCAGTGGCATCTTC        | ATGAAAGGTGTGTCATACTTC      |
| mouse TGM2  | GCCATGGTCAACTGCAATG       | AGAATGTCCACACTGCCAATC      |
| mouse TGM3  | ACATCAGCACCAAGGCAGTAGG    | CCTCGAAGATGTTGCGCCGAAA     |
| mouse F13A1 | CAGCAATGGTGAATGCCAAGGA    | GCTGATGGAGGGATGCCGTA       |

Oligonucleotide PCR primers are listed in the 5'→3' direction

**Supplementary Table S3:** Full list of proteins significantly interacting with TG2 in the WT brain, APP23 brain or both phenotypes.

| <b>ID</b> | <b>TG2-interactor name</b>                                           | <b>p-value</b> | <b>Phenotype</b> |
|-----------|----------------------------------------------------------------------|----------------|------------------|
| 1433F     | 14-3-3 protein eta                                                   | 0.00E+00       | APP23            |
| AATC      | Aspartate aminotransferase, cytoplasmic                              | 0.00E+00       | APP23            |
| AL1B1     | Aldehyde dehydrogenase X, mitochondrial                              | 0.00E+00       | APP23            |
| ARGL1     | Arginine and glutamate-rich protein 1                                | 0.00E+00       | APP23            |
| AT5F1     | ATP synthase F(0) complex subunit B1, mitochondrial                  | 0.00E+00       | APP23            |
| CRYAB     | Alpha-crystallin B chain                                             | 0.00E+00       | APP23            |
| GRID2     | Glutamate receptor ionotropic, delta-2                               | 0.00E+00       | APP23            |
| KCRB      | Creatine kinase B-type                                               | 0.00E+00       | APP23            |
| KV5AD     | Ig kappa chain V-V region HP 123E6                                   | 0.00E+00       | APP23            |
| PGCB      | Brevican core protein                                                | 0.00E+00       | APP23            |
| RS17      | 40S ribosomal protein S17                                            | 0.00E+00       | APP23            |
| SYNE1     | Nesprin-1                                                            | 0.00E+00       | APP23            |
| TPM3      | Tropomyosin alpha-3 chain                                            | 0.00E+00       | APP23            |
| MYO5A     | Unconventional myosin-Va                                             | 0.00E+00       | WT               |
| NDUS3     | NADH dehydrogenase [ubiquinone] iron-sulfur protein 3, mitochondrial | 0.00E+00       | WT               |
| RS16      | 40S ribosomal protein S16                                            | 0.00E+00       | WT               |
| TECR      | Very-long-chain enoyl-CoA reductase                                  | 0.00E+00       | WT               |
| LANC2     | LanC-like protein 2                                                  | 2.44E-15       | APP23            |
| HSP72     | Heat shock-related 70 kDa protein 2                                  | 2.44E-15       | WT               |
| TBB3      | Tubulin beta-3 chain                                                 | 2.44E-15       | WT               |
| PSB1      | Proteasome subunit beta type-1                                       | 3.49E-14       | WT/APP23         |
| ANK1      | Ankyrin-1                                                            | 4.72E-14       | WT               |
| CYC       | Cytochrome c, somatic                                                | 9.15E-14       | APP23            |
| MED23     | Mediator of RNA polymerase II transcription subunit 23               | 4.80E-13       | APP23            |
| RL29      | 60S ribosomal protein L29                                            | 3.04E-12       | APP23            |
| DAAM1     | Disheveled-associated activator of morphogenesis 1                   | 5.07E-12       | WT/APP23         |
| GDIR1     | Rho GDP-dissociation inhibitor 1                                     | 6.76E-12       | APP23            |
| FIBG      | Fibrinogen gamma chain                                               | 1.02E-11       | WT               |
| ATPG      | ATP synthase subunit gamma, mitochondrial                            | 1.09E-11       | APP23            |
| PPCEL     | Prolyl endopeptidase-like                                            | 1.79E-11       | APP23            |
| NRX1A     | Neurexin-1                                                           | 2.09E-11       | APP23            |
| CLH1      | Clathrin heavy chain 1                                               | 3.21E-11       | APP23            |
| CAPS1     | Calcium-dependent secretion activator 1                              | 3.69E-11       | APP23            |
| KKCC2     | Calcium/calmodulin-dependent protein kinase kinase 2                 | 6.98E-11       | APP23            |
| 1433T     | 14-3-3 protein theta                                                 | 7.89E-10       | APP23            |
| VATA      | V-type proton ATPase catalytic subunit A                             | 1.35E-09       | APP23            |
| RL24      | 60S ribosomal protein L24                                            | 7.26E-09       | APP23            |
| CTL1      | Choline transporter-like protein 1                                   | 9.93E-09       | APP23            |
| PURA      | Transcriptional activator protein Pur-alpha                          | 2.23E-08       | APP23            |
| EF1A1     | Elongation factor 1-alpha 1                                          | 3.51E-08       | APP23            |
| MBP       | Myelin basic protein                                                 | 3.69E-08       | APP23            |
| SEPT7     | Septin-7                                                             | 4.47E-08       | APP23            |

|       |                                                                                |          |          |
|-------|--------------------------------------------------------------------------------|----------|----------|
| PURA1 | Adenylosuccinate synthetase isozyme 1                                          | 5.65E-08 | WT       |
| TNIK  | Traf2 and NCK-interacting protein kinase                                       | 1.45E-07 | WT       |
| ITPA  | Inosine triphosphate pyrophosphatase                                           | 1.47E-07 | WT       |
| HIBCH | 3-hydroxyisobutyryl-CoA hydrolase, mitochondrial                               | 2.23E-07 | APP23    |
| CDS2  | Phosphatidate cytidyltransferase 2                                             | 5.10E-07 | APP23    |
| F210A | Protein FAM210A                                                                | 6.83E-07 | WT       |
| SRC8  | Src substrate cortactin                                                        | 9.39E-07 | WT       |
| HMCS1 | Hydroxymethylglutaryl-CoA synthase, cytoplasmic                                | 9.48E-07 | WT       |
| SH3L3 | SH3 domain-binding glutamic acid-rich-like protein 3                           | 1.01E-06 | APP23    |
| PDK3  | [Pyruvate dehydrogenase (acetyl-transferring)] kinase isozyme 3, mitochondrial | 1.18E-06 | APP23    |
| AL4A1 | Delta-1-pyrroline-5-carboxylate dehydrogenase, mitochondrial                   | 1.38E-06 | APP23    |
| GLSK  | Glutaminase kidney isoform, mitochondrial                                      | 1.57E-06 | WT       |
| CADM2 | Cell adhesion molecule 2                                                       | 1.68E-06 | APP23    |
| LRP1  | Prolow-density lipoprotein receptor-related protein 1                          | 2.31E-06 | WT       |
| PCAT1 | Lysophosphatidylcholine acyltransferase 1                                      | 2.33E-06 | APP23    |
| KV2A6 | Ig kappa chain V-II region 7S34.1                                              | 2.46E-06 | APP23    |
| CYLD  | Ubiquitin carboxyl-terminal hydrolase CYLD                                     | 2.88E-06 | WT       |
| IPO9  | Importin-9                                                                     | 2.92E-06 | APP23    |
| PLAP  | Phospholipase A-2-activating protein                                           | 3.24E-06 | WT/APP23 |
| NPTX1 | Neuronal pentraxin-1                                                           | 3.95E-06 | APP23    |
| GLYM  | Serine hydroxymethyltransferase, mitochondrial                                 | 3.97E-06 | APP23    |
| LYRIC | Protein LYRIC                                                                  | 4.00E-06 | APP23    |
| BDH   | D-beta-hydroxybutyrate dehydrogenase, mitochondrial                            | 4.37E-06 | WT       |
| CPNE5 | Copine-5                                                                       | 4.79E-06 | WT       |
| CSK11 | Caskin-1                                                                       | 5.05E-06 | APP23    |
| DMXL2 | DmX-like protein 2                                                             | 5.71E-06 | WT/APP23 |
| PP4P1 | Type 1 phosphatidylinositol 4,5-bisphosphate 4-phosphatase                     | 5.71E-06 | APP23    |
| ENPL  | Endoplasmin                                                                    | 6.63E-06 | WT       |
| CAH2  | Carbonic anhydrase 2                                                           | 7.36E-06 | APP23    |
| GHC1  | Mitochondrial glutamate carrier 1                                              | 8.00E-06 | APP23    |
| KPRA  | Phosphoribosyl pyrophosphate synthase-associated protein 1                     | 1.18E-05 | WT       |
| EFTU  | Elongation factor Tu, mitochondrial                                            | 1.19E-05 | APP23    |
| ATPA  | ATP synthase subunit alpha, mitochondrial                                      | 1.32E-05 | APP23    |
| KCY   | UMP-CMP kinase                                                                 | 1.53E-05 | WT       |
| LSAMP | Limbic system-associated membrane protein                                      | 1.82E-05 | APP23    |
| UGPA  | UTP--glucose-1-phosphate uridylyltransferase                                   | 2.11E-05 | APP23    |
| GLNA  | Glutamine synthetase                                                           | 2.39E-05 | APP23    |
| CFAH  | Complement factor H                                                            | 2.50E-05 | WT       |
| ASTN1 | Astrotactin-1                                                                  | 2.63E-05 | WT       |
| AP1B1 | AP-1 complex subunit beta-1                                                    | 2.80E-05 | APP23    |
| APOE  | Apolipoprotein E                                                               | 3.48E-05 | WT/APP23 |
| SNP25 | Synaptosomal-associated protein 25                                             | 3.60E-05 | APP23    |
| OGFR  | Opioid growth factor receptor                                                  | 4.29E-05 | APP23    |
| SCMC2 | Calcium-binding mitochondrial carrier protein SCaMC-2                          | 4.31E-05 | WT/APP23 |
| IGKC  | Immunoglobulin kappa constant                                                  | 4.49E-05 | APP23    |
| PDIA6 | Protein disulfide-isomerase A6                                                 | 5.13E-05 | APP23    |

|       |                                                           |          |          |
|-------|-----------------------------------------------------------|----------|----------|
| GSTM5 | Glutathione S-transferase Mu 5                            | 5.70E-05 | APP23    |
| TCAL5 | Transcription elongation factor A protein-like 5          | 5.81E-05 | APP23    |
| MA7D1 | MAP7 domain-containing protein 1                          | 6.01E-05 | APP23    |
| ACBG1 | Long-chain-fatty-acid--CoA ligase ACSBG1                  | 6.88E-05 | WT       |
| MAOX  | NADP-dependent malic enzyme                               | 7.79E-05 | APP23    |
| DCTN1 | Dynactin subunit 1                                        | 8.24E-05 | WT       |
| HS71A | Heat shock 70 kDa protein 1A                              | 8.68E-05 | APP23    |
| OCRL  | Inositol polyphosphate 5-phosphatase OCRL-1               | 9.20E-05 | APP23    |
| RUVB2 | RuvB-like 2                                               | 9.81E-05 | WT/APP23 |
| KPCB  | Protein kinase C beta type                                | 1.04E-04 | APP23    |
| VINC  | Vinculin                                                  | 1.07E-04 | APP23    |
| HVM10 | Ig heavy chain V region 1-62-3                            | 1.08E-04 | APP23    |
| H10   | Histone H1.0                                              | 1.09E-04 | WT       |
| H14   | Histone H1.4                                              | 1.24E-04 | APP23    |
| AT1B2 | Sodium/potassium-transporting ATPase subunit beta-2       | 1.26E-04 | APP23    |
| GNAO  | Guanine nucleotide-binding protein G(o) subunit alpha     | 1.43E-04 | APP23    |
| TENR  | Tenascin-R                                                | 1.46E-04 | WT       |
| PGM2L | Glucose 1,6-bisphosphate synthase                         | 1.46E-04 | WT       |
| THOP1 | Thimet oligopeptidase                                     | 1.46E-04 | APP23    |
| CA2D2 | Voltage-dependent calcium channel subunit alpha-2/delta-2 | 1.84E-04 | APP23    |
| IP3KA | Inositol-trisphosphate 3-kinase A                         | 2.27E-04 | WT       |
| DEST  | Destrin                                                   | 2.34E-04 | APP23    |
| SFR1  | Swi5-dependent recombination DNA repair protein 1 homolog | 2.47E-04 | WT       |
| MYH10 | Myosin-10                                                 | 2.47E-04 | APP23    |
| DLDH  | Dihydrolipoyl dehydrogenase, mitochondrial                | 2.53E-04 | APP23    |
| RL13  | 60S ribosomal protein L13                                 | 2.57E-04 | WT/APP23 |
| KV4A1 | Ig kappa chain V-IV region S107B                          | 2.60E-04 | APP23    |
| CDK5  | Cyclin-dependent-like kinase 5                            | 3.01E-04 | APP23    |
| CH10  | 10 kDa heat shock protein, mitochondrial                  | 3.10E-04 | APP23    |
| KCNC3 | Potassium voltage-gated channel subfamily C member 3      | 3.13E-04 | APP23    |
| AL7A1 | Alpha-aminoacidic semialdehyde dehydrogenase              | 3.31E-04 | APP23    |
| EPMIP | EPM2A-interacting protein 1                               | 3.40E-04 | WT       |
| FAS   | Fatty acid synthase                                       | 4.21E-04 | WT       |
| KV5A1 | Ig kappa chain V19-17                                     | 4.72E-04 | APP23    |
| PTN23 | Tyrosine-protein phosphatase non-receptor type 23         | 4.77E-04 | APP23    |
| SAHH  | Adenosylhomocysteinase                                    | 4.91E-04 | APP23    |
| GOGA7 | Golgin subfamily A member 7                               | 5.01E-04 | APP23    |
| VATC1 | V-type proton ATPase subunit C 1                          | 5.25E-04 | WT       |
| NIPS1 | Protein NipSnap homolog 1                                 | 5.28E-04 | WT/APP23 |
| SBP1  | Methanethiol oxidase                                      | 5.92E-04 | WT       |
| PHF24 | PHD finger protein 24                                     | 6.03E-04 | APP23    |
| NDUA4 | Cytochrome c oxidase subunit NDUF4A                       | 6.06E-04 | APP23    |
| KV2A7 | Ig kappa chain V-II region 26-10                          | 6.12E-04 | APP23    |
| DECR  | 2,4-dienoyl-CoA reductase, mitochondrial                  | 6.40E-04 | WT       |
| TCPA  | T-complex protein 1 subunit alpha                         | 6.58E-04 | WT       |
| NCKP1 | Nck-associated protein 1                                  | 6.59E-04 | APP23    |

|       |                                                                              |          |          |
|-------|------------------------------------------------------------------------------|----------|----------|
| IDE   | Insulin-degrading enzyme                                                     | 6.76E-04 | WT       |
| NFL   | Neurofilament light polypeptide                                              | 7.14E-04 | APP23    |
| COX41 | Cytochrome c oxidase subunit 4 isoform 1, mitochondrial                      | 7.47E-04 | APP23    |
| TBB4A | Tubulin beta-4A chain                                                        | 8.23E-04 | APP23    |
| S10AD | Protein S100-A13                                                             | 8.46E-04 | APP23    |
| USP9X | Probable ubiquitin carboxyl-terminal hydrolase FAF-X                         | 8.93E-04 | WT       |
| RAB3A | Ras-related protein Rab-3A                                                   | 9.62E-04 | APP23    |
| USMG5 | Up-regulated during skeletal muscle growth protein 5                         | 9.67E-04 | WT       |
| ADPRH | [Protein ADP-ribosylarginine] hydrolase                                      | 1.05E-03 | APP23    |
| LRC59 | Leucine-rich repeat-containing protein 59                                    | 1.18E-03 | APP23    |
| RIN1  | Ras and Rab interactor 1                                                     | 1.26E-03 | WT/APP23 |
| CAMP3 | Calmodulin-regulated spectrin-associated protein 3                           | 1.28E-03 | APP23    |
| DYN1  | Dynamin-1                                                                    | 1.43E-03 | APP23    |
| FA98B | Protein FAM98B                                                               | 1.53E-03 | APP23    |
| CNDP2 | Cytosolic non-specific dipeptidase                                           | 1.59E-03 | WT       |
| SCG2  | Secretogranin-2                                                              | 1.65E-03 | APP23    |
| SYT1  | Synaptotagmin-1                                                              | 1.65E-03 | APP23    |
| HEMH  | Ferrochelatase, mitochondrial                                                | 1.79E-03 | WT       |
| CMTD1 | Catechol O-methyltransferase domain-containing protein 1                     | 1.85E-03 | APP23    |
| K1C42 | Keratin, type I cytoskeletal 42                                              | 1.86E-03 | APP23    |
| NDUS2 | NADH dehydrogenase [ubiquinone] iron-sulfur protein 2, mitochondrial         | 1.96E-03 | WT       |
| RAB7A | Ras-related protein Rab-7a                                                   | 1.99E-03 | APP23    |
| RL7   | 60S ribosomal protein L7                                                     | 2.02E-03 | WT       |
| TRI32 | E3 ubiquitin-protein ligase TRIM32                                           | 2.03E-03 | WT       |
| TIM44 | Mitochondrial import inner membrane translocase subunit TIM44                | 2.19E-03 | WT       |
| SMD3  | Small nuclear ribonucleoprotein Sm D3                                        | 2.19E-03 | APP23    |
| 1433G | 14-3-3 protein gamma                                                         | 2.26E-03 | WT       |
| PPP5  | Serine/threonine-protein phosphatase 5                                       | 2.30E-03 | APP23    |
| MTMR5 | Myotubularin-related protein 5                                               | 2.33E-03 | APP23    |
| ATPD  | ATP synthase subunit delta, mitochondrial                                    | 2.37E-03 | APP23    |
| ENAH  | Protein enabled homolog                                                      | 2.42E-03 | APP23    |
| QORL2 | Quinone oxidoreductase-like protein 2                                        | 2.54E-03 | WT/APP23 |
| GGCT  | Gamma-glutamylcyclotransferase                                               | 2.62E-03 | APP23    |
| XPO7  | Exportin-7                                                                   | 2.64E-03 | APP23    |
| NDUAA | NADH dehydrogenase [ubiquinone] 1 alpha subcomplex subunit 10, mitochondrial | 2.68E-03 | APP23    |
| DYHC1 | Cytoplasmic dynein 1 heavy chain 1                                           | 2.83E-03 | APP23    |
| THIM  | 3-ketoacyl-CoA thiolase, mitochondrial                                       | 2.86E-03 | APP23    |
| K22E  | Keratin, type II cytoskeletal 2 epidermal                                    | 2.89E-03 | APP23    |
| K2C1  | Keratin, type II cytoskeletal 1                                              | 2.91E-03 | WT       |
| PTPRD | Receptor-type tyrosine-protein phosphatase delta                             | 3.12E-03 | WT       |
| RAP2B | Ras-related protein Rap-2b                                                   | 3.15E-03 | APP23    |
| CBR4  | Carbonyl reductase family member 4                                           | 3.20E-03 | WT       |
| AT2B1 | Plasma membrane calcium-transporting ATPase 1                                | 3.24E-03 | APP23    |
| CY1   | Cytochrome c1, heme protein, mitochondrial                                   | 3.31E-03 | APP23    |
| KPCG  | Protein kinase C gamma type                                                  | 3.35E-03 | APP23    |
| HVM32 | Ig heavy chain V-III region J606                                             | 3.40E-03 | WT       |

|       |                                                                          |          |          |
|-------|--------------------------------------------------------------------------|----------|----------|
| SH3G1 | Endophilin-A2                                                            | 3.45E-03 | APP23    |
| SPB6  | Serpin B6                                                                | 3.46E-03 | WT       |
| PSD12 | 26S proteasome non-ATPase regulatory subunit 12                          | 3.85E-03 | WT       |
| ADA10 | Disintegrin and metalloproteinase domain-containing protein 10           | 4.18E-03 | WT       |
| INF2  | Inverted formin-2                                                        | 4.23E-03 | WT       |
| MK03  | Mitogen-activated protein kinase 3                                       | 4.23E-03 | APP23    |
| TXTP  | Tricarboxylate transport protein, mitochondrial                          | 4.46E-03 | APP23    |
| PGK1  | Phosphoglycerate kinase 1                                                | 4.57E-03 | APP23    |
| SEM3C | Semaphorin-3C                                                            | 4.58E-03 | APP23    |
| TOM34 | Mitochondrial import receptor subunit TOM34                              | 4.61E-03 | WT/APP23 |
| SYRC  | Arginine--tRNA ligase, cytoplasmic                                       | 4.64E-03 | WT/APP23 |
| TRIO  | Triple functional domain protein                                         | 4.70E-03 | APP23    |
| NLTP  | Non-specific lipid-transfer protein                                      | 4.74E-03 | APP23    |
| RSU1  | Ras suppressor protein 1                                                 | 4.75E-03 | WT       |
| K1C10 | Keratin, type I cytoskeletal 10                                          | 4.76E-03 | APP23    |
| CX7A2 | Cytochrome c oxidase subunit 7A2, mitochondrial                          | 4.93E-03 | WT/APP23 |
| CP250 | Centrosome-associated protein CEP250                                     | 5.15E-03 | WT       |
| GNAZ  | Guanine nucleotide-binding protein G(z) subunit alpha                    | 5.24E-03 | APP23    |
| GABT  | 4-aminobutyrate aminotransferase, mitochondrial                          | 5.76E-03 | WT       |
| ABHGA | Protein ABHD16A                                                          | 5.93E-03 | APP23    |
| CLVS1 | Clavesin-1                                                               | 5.95E-03 | WT/APP23 |
| NRX2A | Neurexin-2                                                               | 6.00E-03 | APP23    |
| PYC   | Pyruvate carboxylase, mitochondrial                                      | 6.15E-03 | WT       |
| DNJB1 | DnaJ homolog subfamily B member 1                                        | 6.16E-03 | WT       |
| KV3A4 | Ig kappa chain V-III region 50S10.1                                      | 6.30E-03 | APP23    |
| CAD12 | Cadherin-12                                                              | 6.42E-03 | WT       |
| RS13  | 40S ribosomal protein S13                                                | 6.68E-03 | WT       |
| ANXA5 | Annexin A5                                                               | 6.80E-03 | APP23    |
| INP4A | Type I inositol 3,4-bisphosphate 4-phosphatase                           | 6.88E-03 | WT       |
| CUL2  | Cullin-2                                                                 | 6.91E-03 | APP23    |
| SCAM1 | Secretory carrier-associated membrane protein 1                          | 7.08E-03 | APP23    |
| EIF3D | Eukaryotic translation initiation factor 3 subunit D                     | 7.59E-03 | WT       |
| CYTC  | Cystatin-C                                                               | 7.67E-03 | WT       |
| VPS35 | Vacuolar protein sorting-associated protein 35                           | 7.76E-03 | APP23    |
| DHX15 | Pre-mRNA-splicing factor ATP-dependent RNA helicase DHX15                | 7.78E-03 | APP23    |
| PICAL | Phosphatidylinositol-binding clathrin assembly protein                   | 7.81E-03 | WT       |
| SYSC  | Serine--tRNA ligase, cytoplasmic                                         | 7.84E-03 | APP23    |
| VPS18 | Vacuolar protein sorting-associated protein 18 homolog                   | 7.90E-03 | WT       |
| ATLA1 | Atlastin-1                                                               | 8.09E-03 | WT       |
| RAN   | GTP-binding nuclear protein Ran                                          | 8.14E-03 | APP23    |
| PSMD8 | 26S proteasome non-ATPase regulatory subunit 8                           | 8.58E-03 | WT       |
| GSTA4 | Glutathione S-transferase A4                                             | 8.78E-03 | WT/APP23 |
| HYEP  | Epoxide hydrolase 1                                                      | 8.81E-03 | WT       |
| TPC11 | Trafficking protein particle complex subunit 11                          | 8.81E-03 | APP23    |
| PRUN1 | Exopolyphosphatase PRUNE1                                                | 9.35E-03 | APP23    |
| RPN1  | Dolichyl-diphosphooligosaccharide--protein glycosyltransferase subunit 1 | 9.50E-03 | APP23    |

|       |                                                                 |          |          |
|-------|-----------------------------------------------------------------|----------|----------|
| CYFP2 | Cytoplasmic FMR1-interacting protein 2                          | 9.55E-03 | WT       |
| GNB5  | Guanine nucleotide-binding protein subunit beta-5               | 9.56E-03 | APP23    |
| NRCAM | Neuronal cell adhesion molecule                                 | 9.64E-03 | WT       |
| RIF1  | Telomere-associated protein RIF1                                | 9.66E-03 | WT/APP23 |
| SCOT1 | Succinyl-CoA:3-ketoacid coenzyme A transferase 1, mitochondrial | 9.68E-03 | WT       |
| H13   | Histone H1.3                                                    | 9.84E-03 | APP23    |
| SYHC  | Histidine--tRNA ligase, cytoplasmic                             | 1.00E-02 | APP23    |
| PDIA3 | Protein disulfide-isomerase A3                                  | 1.01E-02 | WT       |
| L2GL1 | Lethal(2) giant larvae protein homolog 1                        | 1.01E-02 | WT       |
| PCCA  | Propionyl-CoA carboxylase alpha chain, mitochondrial            | 1.05E-02 | WT       |
| CUL5  | Cullin-5                                                        | 1.07E-02 | WT       |
| SUCB1 | Succinate--CoA ligase [ADP-forming] subunit beta, mitochondrial | 1.07E-02 | APP23    |
| CE170 | Centrosomal protein of 170 kDa                                  | 1.08E-02 | APP23    |
| CA2D1 | Voltage-dependent calcium channel subunit alpha-2/delta-1       | 1.08E-02 | APP23    |
| CALX  | Calnexin                                                        | 1.11E-02 | WT       |
| E41L1 | Band 4.1-like protein 1                                         | 1.12E-02 | APP23    |
| ML12B | Myosin regulatory light chain 12B                               | 1.12E-02 | WT/APP23 |
| GDIB  | Rab GDP dissociation inhibitor beta                             | 1.13E-02 | APP23    |
| UCHL1 | Ubiquitin carboxyl-terminal hydrolase isozyme L1                | 1.14E-02 | APP23    |
| KV2A5 | Ig kappa chain V-II region 17S29.1                              | 1.18E-02 | APP23    |
| K22O  | Keratin, type II cytoskeletal 2 oral                            | 1.18E-02 | APP23    |
| VATB2 | V-type proton ATPase subunit B, brain isoform                   | 1.19E-02 | APP23    |
| F162A | Protein FAM162A                                                 | 1.22E-02 | WT       |
| GNAI2 | Guanine nucleotide-binding protein G(i) subunit alpha-2         | 1.24E-02 | APP23    |
| CAP2  | Adenylyl cyclase-associated protein 2                           | 1.24E-02 | APP23    |
| IGSF8 | Immunoglobulin superfamily member 8                             | 1.28E-02 | APP23    |
| TXD12 | Thioredoxin domain-containing protein 12                        | 1.30E-02 | WT/APP23 |
| ABD12 | Monoacylglycerol lipase ABHD12                                  | 1.32E-02 | WT       |
| NQO2  | Ribosyl-dihydroxynicotinamide dehydrogenase [quinone]           | 1.32E-02 | WT       |
| RL23A | 60S ribosomal protein L23a                                      | 1.33E-02 | APP23    |
| WDR7  | WD repeat-containing protein 7                                  | 1.45E-02 | APP23    |
| TAGL2 | Transgelin-2                                                    | 1.47E-02 | APP23    |
| DPYL2 | Dihydropyrimidinase-related protein 2                           | 1.48E-02 | APP23    |
| RAB14 | Ras-related protein Rab-14                                      | 1.48E-02 | APP23    |
| HEXB  | Beta-hexosaminidase subunit beta                                | 1.49E-02 | WT       |
| SR140 | U2 snRNP-associated SURP motif-containing protein               | 1.50E-02 | APP23    |
| CKAP5 | Cytoskeleton-associated protein 5                               | 1.52E-02 | WT       |
| GPM6A | Neuronal membrane glycoprotein M6-a                             | 1.52E-02 | APP23    |
| ACACA | Acetyl-CoA carboxylase 1                                        | 1.52E-02 | APP23    |
| GHC2  | Mitochondrial glutamate carrier 2                               | 1.54E-02 | APP23    |
| MAON  | NADP-dependent malic enzyme, mitochondrial                      | 1.56E-02 | APP23    |
| TAGL3 | Transgelin-3                                                    | 1.56E-02 | WT       |
| MYPR  | Myelin proteolipid protein                                      | 1.62E-02 | APP23    |
| SODM  | Superoxide dismutase [Mn], mitochondrial                        | 1.63E-02 | APP23    |
| MSRA  | Mitochondrial peptide methionine sulfoxide reductase            | 1.64E-02 | WT       |
| ALG2  | Alpha-1,3/1,6-mannosyltransferase ALG2                          | 1.70E-02 | WT       |

|       |                                                                                  |          |          |
|-------|----------------------------------------------------------------------------------|----------|----------|
| PP2BA | Serine/threonine-protein phosphatase 2B catalytic subunit alpha isoform          | 1.73E-02 | APP23    |
| ODPA  | Pyruvate dehydrogenase E1 component subunit alpha, somatic form, mitochondrial   | 1.74E-02 | APP23    |
| HCN1  | Potassium/sodium hyperpolarization-activated cyclic nucleotide-gated channel 1   | 1.77E-02 | APP23    |
| AP3B2 | AP-3 complex subunit beta-2                                                      | 1.82E-02 | WT       |
| PRAF3 | PRA1 family protein 3                                                            | 1.84E-02 | APP23    |
| SPCS  | O-phosphoserine-tRNA(Sec) selenium transferase                                   | 1.85E-02 | WT       |
| S12A5 | Solute carrier family 12 member 5                                                | 1.90E-02 | WT       |
| NDRG1 | Protein NDRG1                                                                    | 1.92E-02 | WT/APP23 |
| SPTN1 | Spectrin alpha chain, non-erythrocytic 1                                         | 1.99E-02 | APP23    |
| APBB1 | Amyloid-beta A4 precursor protein-binding family B member 1                      | 2.04E-02 | WT       |
| OGT1  | UDP-N-acetylglucosamine--peptide N-acetylglucosaminyltransferase 110 kDa subunit | 2.04E-02 | WT       |
| SFXN3 | Sideroflexin-3                                                                   | 2.04E-02 | APP23    |
| PHIPL | Phytanoyl-CoA hydroxylase-interacting protein-like                               | 2.05E-02 | APP23    |
| NGEF  | Ephexin-1                                                                        | 2.07E-02 | WT       |
| CCDC6 | Coiled-coil domain-containing protein 6                                          | 2.10E-02 | WT/APP23 |
| TMX2  | Thioredoxin-related transmembrane protein 2                                      | 2.13E-02 | WT       |
| HVM57 | Ig heavy chain V region 6.96                                                     | 2.15E-02 | APP23    |
| ARBK1 | Beta-adrenergic receptor kinase 1                                                | 2.35E-02 | WT       |
| PLXB2 | Plexin-B2                                                                        | 2.37E-02 | APP23    |
| PGP   | Glycerol-3-phosphate phosphatase                                                 | 2.37E-02 | WT/APP23 |
| NDUB2 | NADH dehydrogenase [ubiquinone] 1 beta subcomplex subunit 2, mitochondrial       | 2.40E-02 | WT/APP23 |
| CRYM  | Ketimine reductase mu-crystallin                                                 | 2.41E-02 | WT       |
| ABR   | Active breakpoint cluster region-related protein                                 | 2.46E-02 | WT       |
| HNRPU | Heterogeneous nuclear ribonucleoprotein U                                        | 2.48E-02 | APP23    |
| RAB21 | Ras-related protein Rab-21                                                       | 2.58E-02 | WT       |
| CNN3  | Calponin-3                                                                       | 2.63E-02 | WT/APP23 |
| RHEB  | GTP-binding protein Rheb                                                         | 2.67E-02 | WT       |
| ITPR1 | Inositol 1,4,5-trisphosphate receptor type 1                                     | 2.71E-02 | WT       |
| WASF1 | Wiskott-Aldrich syndrome protein family member 1                                 | 2.83E-02 | WT       |
| MDHC  | Malate dehydrogenase, cytoplasmic                                                | 2.84E-02 | APP23    |
| NC2A  | Dr1-associated corepressor                                                       | 2.87E-02 | WT/APP23 |
| NEUG  | Neurogranin                                                                      | 2.88E-02 | APP23    |
| TIF1B | Transcription intermediary factor 1-beta                                         | 2.92E-02 | APP23    |
| COMD3 | COMM domain-containing protein 3                                                 | 2.92E-02 | APP23    |
| SC6A1 | Sodium- and chloride-dependent GABA transporter 1                                | 2.93E-02 | WT/APP23 |
| CHERP | Calcium homeostasis endoplasmic reticulum protein                                | 2.97E-02 | APP23    |
| CYFP1 | Cytoplasmic FMR1-interacting protein 1                                           | 2.97E-02 | APP23    |
| L1CAM | Neural cell adhesion molecule L1                                                 | 3.17E-02 | WT/APP23 |
| ADHX  | Alcohol dehydrogenase class-3                                                    | 3.18E-02 | WT       |
| GLTP  | Glycolipid transfer protein                                                      | 3.21E-02 | APP23    |
| ACTG  | Actin, cytoplasmic 2                                                             | 3.22E-02 | APP23    |
| GRIA2 | Glutamate receptor 2                                                             | 3.29E-02 | APP23    |
| HVM54 | Ig heavy chain V region 5-84                                                     | 3.29E-02 | APP23    |
| ALDOC | Fructose-bisphosphate aldolase C                                                 | 3.40E-02 | APP23    |
| ABCB8 | ATP-binding cassette sub-family B member 8, mitochondrial                        | 3.42E-02 | APP23    |



|       |                                                                  |          |          |
|-------|------------------------------------------------------------------|----------|----------|
| ACADM | Medium-chain specific acyl-CoA dehydrogenase, mitochondrial      | 3.46E-02 | WT       |
| GARS  | Glycine--tRNA ligase                                             | 3.48E-02 | WT       |
| RACK1 | Receptor of activated protein C kinase 1                         | 3.49E-02 | WT       |
| ACLY  | ATP-citrate synthase                                             | 3.65E-02 | WT       |
| K0513 | Uncharacterized protein KIAA0513                                 | 3.66E-02 | APP23    |
| SRP54 | Signal recognition particle 54 kDa protein                       | 3.67E-02 | APP23    |
| TMM65 | Transmembrane protein 65                                         | 3.68E-02 | APP23    |
| HVM02 | Ig heavy chain V region 93G7                                     | 3.70E-02 | APP23    |
| SAHH2 | S-adenosylhomocysteine hydrolase-like protein 1                  | 3.76E-02 | APP23    |
| MY18A | Unconventional myosin-XVIIIa                                     | 3.76E-02 | WT       |
| FUS   | RNA-binding protein FUS                                          | 3.80E-02 | WT       |
| SCN9A | Sodium channel protein type 9 subunit alpha                      | 3.82E-02 | WT       |
| SNAA  | Alpha-soluble NSF attachment protein                             | 3.85E-02 | WT       |
| PCBP1 | Poly(rC)-binding protein 1                                       | 3.92E-02 | APP23    |
| ATP5J | ATP synthase-coupling factor 6, mitochondrial                    | 3.96E-02 | WT       |
| E41L3 | Band 4.1-like protein 3                                          | 3.99E-02 | WT       |
| RRAGC | Ras-related GTP-binding protein C                                | 4.03E-02 | WT       |
| CMPK2 | UMP-CMP kinase 2, mitochondrial                                  | 4.07E-02 | WT       |
| THUM1 | THUMP domain-containing protein 1                                | 4.09E-02 | WT/APP23 |
| SYT2  | Synaptotagmin-2                                                  | 4.16E-02 | WT/APP23 |
| COR1C | Coronin-1C                                                       | 4.23E-02 | APP23    |
| ENOG  | Gamma-enolase                                                    | 4.25E-02 | APP23    |
| HS105 | Heat shock protein 105 kDa                                       | 4.26E-02 | WT       |
| ODO1  | 2-oxoglutarate dehydrogenase, mitochondrial                      | 4.28E-02 | WT       |
| QCR1  | Cytochrome b-c1 complex subunit 1, mitochondrial                 | 4.28E-02 | APP23    |
| SOGA3 | Protein SOGA3                                                    | 4.39E-02 | WT       |
| COX6C | Cytochrome c oxidase subunit 6C                                  | 4.41E-02 | WT       |
| HEMO  | Hemopexin                                                        | 4.45E-02 | WT/APP23 |
| MPC2  | Mitochondrial pyruvate carrier 2                                 | 4.48E-02 | APP23    |
| BIEA  | Biliverdin reductase A                                           | 4.49E-02 | WT       |
| ACOC  | Cytoplasmic aconitate hydratase                                  | 4.60E-02 | APP23    |
| ALDR  | Aldose reductase                                                 | 4.64E-02 | WT       |
| AT1A1 | Sodium/potassium-transporting ATPase subunit alpha-1             | 4.66E-02 | APP23    |
| PEF1  | Peflin                                                           | 4.67E-02 | WT       |
| IMPA1 | Inositol monophosphatase 1                                       | 4.70E-02 | APP23    |
| LYNX1 | Ly-6/neurotoxin-like protein 1                                   | 4.79E-02 | WT       |
| ELOB  | Elongin-B                                                        | 4.92E-02 | WT       |
| NSF1C | NSFL1 cofactor p47                                               | 5.00E-02 | APP23    |
| PRSR2 | Proline and serine-rich protein 2                                | 5.13E-02 | WT       |
| H33   | Histone H3.3                                                     | 5.17E-02 | APP23    |
| DNJA4 | DnaJ homolog subfamily A member 4                                | 5.23E-02 | WT       |
| ATPK  | ATP synthase subunit f, mitochondrial                            | 5.25E-02 | WT       |
| KV5AC | Ig kappa chain V-V region HP 93G7                                | 5.33E-02 | WT       |
| U2AF1 | Splicing factor U2AF 35 kDa subunit                              | 5.37E-02 | APP23    |
| GBB2  | Guanine nucleotide-binding protein G(I)/G(S)/G(T) subunit beta-2 | 5.40E-02 | WT       |
| PABP1 | Polyadenylate-binding protein 1                                  | 5.45E-02 | WT       |

|      |                                   |          |          |
|------|-----------------------------------|----------|----------|
| ALBU | Serum albumin                     | 5.45E-02 | WT/APP23 |
| GRM3 | Metabotropic glutamate receptor 3 | 5.48E-02 | APP23    |
| AINX | Alpha-internexin                  | 5.48E-02 | APP23    |

The specificity of association with TG2 was evaluated by z-test analysis ( $P \leq 0.05$ ) of  $n=5$  animals per cohort, using the TG2<sup>-/-</sup> mice as background control (as outlined in Figure 3, A and B). Proteins are denoted by full name and UniProtKB protein entry name (ID), and they are listed according to the specificity of the interaction with TG2 (p-value). WT/APP23, TG2-associated proteins in both WT and APP23 brain (p-value listed is for WT); WT, TG2-associated proteins in WT brain; APP23, TG2-associated proteins in APP23 brain.
